# Supplementary material for: Ca2+-dependent calmodulin binding to cardiac ryanodine receptor (RyR2) calmodulin-binding domains
Source: PubMed Central journal article supplement (PMC6340113; doi:10.1042/bcj20180545), 2019-01-18
Supplement: BCJ-476-193-s1.pdf [file BCJ-476-193-s1.pdf]

Table S1: Fitted  $K_D$ -values for full length CaM binding to RyR2 CaMBD peptides. ‘Upper’ and ‘Lower’ indicate the 95 % confidence intervals for the fitted  $K_D$ . Omitted data indicates that the affinity was either too low or high for reliable fitting i.e.  $K_D$  values outside the range 5  $\mu\text{M}$  – 1 nM.  $K_D$  values are given in  $\mu\text{M}$ .

| $[\text{Ca}^{2+}]$<br>( $\mu\text{M}$ ) | Full length CaM |       |       |              |       |       |              |       |       |              |       |       |              |       |       |              |       |       |               |       |       |               |       |       |
|-----------------------------------------|-----------------|-------|-------|--------------|-------|-------|--------------|-------|-------|--------------|-------|-------|--------------|-------|-------|--------------|-------|-------|---------------|-------|-------|---------------|-------|-------|
|                                         | CaMBD1a         |       |       | CaMBD1b      |       |       | CaMBD1b+P    |       |       | CaMBD2       |       |       | CaMBD3       |       |       | CaMBD2(+)    |       |       | CaMBD2(+)-W/A |       |       | CaMBD2(+)-F/A |       |       |
|                                         | $K_D$           | Upper | Lower | $K_D$        | Upper | Lower | $K_D$        | Upper | Lower | $K_D$        | Upper | Lower | $K_D$        | Upper | Lower | $K_D$        | Upper | Lower | $K_D$         | Upper | Lower | $K_D$         | Upper | Lower |
| <b>0.000</b>                            |                 |       |       |              |       |       |              |       |       | <b>0.39</b>  | 0.46  | 0.31  | <b>0.53</b>  | 0.58  | 0.48  | <b>0.95</b>  | 1.02  | 0.88  | <b>4.8</b>    | 5.3   | 4.2   | <b>0.90</b>   | 1.08  | 0.73  |
| <b>0.003</b>                            |                 |       |       |              |       |       |              |       |       | <b>0.32</b>  | 0.37  | 0.27  | <b>0.54</b>  | 0.57  | 0.51  | <b>0.77</b>  | 0.86  | 0.68  | <b>4.5</b>    | 5.2   | 3.9   | <b>0.63</b>   | 0.77  | 0.50  |
| <b>0.006</b>                            |                 |       |       |              |       |       |              |       |       | <b>0.26</b>  | 0.30  | 0.23  | <b>0.45</b>  | 0.48  | 0.42  | <b>0.63</b>  | 0.66  | 0.61  | <b>4.6</b>    | 5.0   | 4.3   | <b>0.66</b>   | 0.78  | 0.53  |
| <b>0.013</b>                            |                 |       |       |              |       |       |              |       |       | <b>0.19</b>  | 0.22  | 0.17  | <b>0.46</b>  | 0.51  | 0.41  | <b>0.41</b>  | 0.43  | 0.38  | <b>4.4</b>    | 4.4   | 4.4   | <b>0.47</b>   | 0.53  | 0.40  |
| <b>0.025</b>                            |                 |       |       |              |       |       |              |       |       | <b>0.073</b> | 0.085 | 0.062 | <b>0.27</b>  | 0.29  | 0.25  | <b>0.15</b>  | 0.17  | 0.13  | <b>3.7</b>    | 4.6   | 2.9   | <b>0.22</b>   | 0.23  | 0.21  |
| <b>0.050</b>                            |                 |       |       |              |       |       |              |       |       | <b>0.025</b> | 0.030 | 0.019 | <b>0.134</b> | 0.155 | 0.113 | <b>0.063</b> | 0.072 | 0.055 | <b>2.8</b>    | 3.1   | 2.5   | <b>0.090</b>  | 0.117 | 0.063 |
| <b>0.100</b>                            |                 |       |       |              |       |       |              |       |       | <b>0.004</b> | 0.007 | 0.001 | <b>0.035</b> | 0.041 | 0.029 | <b>0.018</b> | 0.021 | 0.015 | <b>1.7</b>    | 1.8   | 1.5   | <b>0.025</b>  | 0.027 | 0.022 |
| <b>0.200</b>                            |                 |       |       | <b>1.9</b>   | 2.1   | 1.7   | <b>4.7</b>   | 5.4   | 4.1   | <b>0.001</b> | 0.003 | 0.000 | <b>0.007</b> | 0.009 | 0.006 | <b>0.006</b> | 0.007 | 0.004 | <b>0.587</b>  | 0.627 | 0.546 | <b>0.010</b>  | 0.012 | 0.008 |
| <b>0.398</b>                            | <b>4.2</b>      | 4.7   | 3.8   | <b>0.59</b>  | 0.66  | 0.52  | <b>1.6</b>   | 2.0   | 1.3   |              |       |       | <b>0.001</b> | 0.002 | 0.001 | <b>0.002</b> | 0.003 | 0.002 | <b>0.181</b>  | 0.205 | 0.156 | <b>0.005</b>  | 0.007 | 0.003 |
| <b>0.794</b>                            | <b>1.6</b>      | 1.7   | 1.4   | <b>0.17</b>  | 0.21  | 0.14  | <b>0.43</b>  | 0.47  | 0.40  |              |       |       |              |       |       | <b>0.002</b> | 0.004 | 0.000 | <b>0.048</b>  | 0.055 | 0.041 | <b>0.002</b>  | 0.003 | 0.001 |
| <b>1.58</b>                             | <b>0.25</b>     | 0.27  | 0.23  | <b>0.066</b> | 0.079 | 0.054 | <b>0.19</b>  | 0.21  | 0.17  |              |       |       |              |       |       | <b>0.002</b> | 0.003 | 0.001 | <b>0.025</b>  | 0.030 | 0.019 | <b>0.003</b>  | 0.006 | 0.000 |
| <b>3.98</b>                             | <b>0.15</b>     | 0.16  | 0.14  | <b>0.031</b> | 0.046 | 0.016 | <b>0.13</b>  | 0.16  | 0.09  |              |       |       |              |       |       |              |       |       | <b>0.014</b>  | 0.018 | 0.011 | <b>0.002</b>  | 0.002 | 0.001 |
| <b>10.0</b>                             | <b>0.090</b>    | 0.097 | 0.084 | <b>0.017</b> | 0.024 | 0.010 | <b>0.050</b> | 0.071 | 0.030 |              |       |       |              |       |       |              |       |       | <b>0.009</b>  | 0.011 | 0.007 | <b>0.001</b>  | 0.002 | 0.001 |
| <b>25.1</b>                             | <b>0.058</b>    | 0.062 | 0.054 | <b>0.012</b> | 0.015 | 0.009 | <b>0.037</b> | 0.052 | 0.022 |              |       |       |              |       |       |              |       |       | <b>0.008</b>  | 0.011 | 0.005 | <b>0.001</b>  | 0.002 | 0.000 |
| <b>100</b>                              | <b>0.072</b>    | 0.077 | 0.067 | <b>0.011</b> | 0.015 | 0.007 | <b>0.033</b> | 0.039 | 0.027 |              |       |       |              |       |       |              |       |       | <b>0.007</b>  | 0.010 | 0.003 | <b>0.001</b>  | 0.002 | 0.000 |
| <b>398</b>                              | <b>0.070</b>    | 0.075 | 0.066 | <b>0.014</b> | 0.017 | 0.010 | <b>0.032</b> | 0.037 | 0.026 |              |       |       |              |       |       |              |       |       | <b>0.009</b>  | 0.011 | 0.007 | <b>0.002</b>  | 0.003 | 0.001 |

Table S2: Fitted  $K_D$ -values for isolated CaM domains binding to RyR2 CaMBD peptides. Data entered as described for Table S1.

| [Ca <sup>2+</sup> ]<br>( $\mu$ M) | N-domain |       |       |           |       |       |               |       |       | C-domain |       |       |        |       |       |           |       |       |               |       |       |        |       |       |
|-----------------------------------|----------|-------|-------|-----------|-------|-------|---------------|-------|-------|----------|-------|-------|--------|-------|-------|-----------|-------|-------|---------------|-------|-------|--------|-------|-------|
|                                   | CaMBD2   |       |       | CaMBD2(+) |       |       | CaMBD2(+)-F/A |       |       | CaMBD3   |       |       | CaMBD2 |       |       | CaMBD2(+) |       |       | CaMBD2(+)-F/A |       |       | CaMBD3 |       |       |
|                                   | $K_D$    | Upper | Lower | $K_D$     | Upper | Lower | $K_D$         | Upper | Lower | $K_D$    | Upper | Lower | $K_D$  | Upper | Lower | $K_D$     | Upper | Lower | $K_D$         | Upper | Lower | $K_D$  | Upper | Lower |
| 0.000                             |          |       |       |           |       |       |               |       |       |          |       |       | 5.7    | 6.3   | 5.1   | 3.7       | 5.9   | 1.4   | 9.0           | 13.7  | 4.2   | 4.0    | 4.7   | 3.4   |
| 0.003                             |          |       |       |           |       |       |               |       |       |          |       |       | 4.2    | 5.5   | 2.9   | 2.9       | 4.5   | 1.3   | 4.7           | 7.3   | 2.1   | 3.3    | 6.0   | 0.6   |
| 0.006                             |          |       |       |           |       |       |               |       |       |          |       |       | 4.6    | 4.9   | 4.3   | 3.1       | 4.6   | 1.6   | 5.7           | 8.0   | 3.4   | 4.4    | 5.7   | 3.0   |
| 0.013                             |          |       |       |           |       |       |               |       |       |          |       |       | 3.7    | 4.9   | 2.5   | 2.6       | 3.9   | 1.4   | 3.8           | 5.7   | 1.9   | 3.0    | 5.5   | 0.5   |
| 0.025                             |          |       |       |           |       |       |               |       |       |          |       |       | 1.7    | 1.9   | 1.5   | 2.2       | 3.1   | 1.3   | 2.5           | 2.8   | 2.2   | 3.5    | 4.0   | 3.0   |
| 0.050                             |          |       |       |           |       |       |               |       |       |          |       |       | 0.76   | 0.96  | 0.56  | 1.2       | 1.6   | 0.8   | 1.0           | 1.1   | 0.9   | 2.1    | 3.3   | 1.0   |
| 0.100                             |          |       |       |           |       |       |               |       |       |          |       |       | 0.22   | 0.27  | 0.17  | 0.50      | 0.54  | 0.47  | 0.34          | 0.42  | 0.25  | 1.5    | 1.6   | 1.3   |
| 0.200                             |          |       |       |           |       |       |               |       |       |          |       |       | 0.044  | 0.057 | 0.030 | 0.097     | 0.136 | 0.059 | 0.068         | 0.086 | 0.050 | 0.49   | 0.53  | 0.45  |
| 0.398                             | 4.2      | 7.7   | 0.6   |           |       |       |               |       |       | 2.0      | 2.7   | 1.2   | 0.013  | 0.017 | 0.009 | 0.048     | 0.062 | 0.034 | 0.022         | 0.028 | 0.015 | 0.19   | 0.21  | 0.16  |
| 0.794                             | 2.1      | 2.7   | 1.4   | 3.7       | 4.6   | 2.8   | 3.7           | 4.8   | 2.6   | 0.64     | 0.72  | 0.55  | 0.008  | 0.010 | 0.005 | 0.021     | 0.027 | 0.015 | 0.013         | 0.017 | 0.008 | 0.071  | 0.090 | 0.051 |
| 1.58                              | 1.5      | 1.7   | 1.3   | 2.4       | 2.8   | 2.0   | 1.9           | 2.1   | 1.6   | 0.26     | 0.31  | 0.22  | 0.005  | 0.007 | 0.003 | 0.016     | 0.021 | 0.011 | 0.010         | 0.014 | 0.007 | 0.050  | 0.064 | 0.037 |
| 3.98                              | 0.95     | 1.01  | 0.89  | 1.2       | 1.2   | 1.1   | 1.2           | 1.3   | 1.1   | 0.14     | 0.18  | 0.10  | 0.005  | 0.007 | 0.003 | 0.012     | 0.015 | 0.010 | 0.008         | 0.013 | 0.004 | 0.040  | 0.050 | 0.029 |
| 10.0                              | 0.53     | 0.60  | 0.46  | 0.71      | 0.76  | 0.67  | 0.78          | 0.83  | 0.73  | 0.088    | 0.102 | 0.075 | 0.004  | 0.006 | 0.003 | 0.011     | 0.014 | 0.007 | 0.010         | 0.016 | 0.003 | 0.034  | 0.044 | 0.025 |
| 25.1                              | 0.34     | 0.37  | 0.32  | 0.58      | 0.63  | 0.54  | 0.62          | 0.66  | 0.57  | 0.075    | 0.096 | 0.054 | 0.004  | 0.006 | 0.002 | 0.012     | 0.015 | 0.009 | 0.008         | 0.010 | 0.006 | 0.032  | 0.040 | 0.024 |
| 100                               | 0.36     | 0.45  | 0.28  | 0.61      | 0.66  | 0.55  | 0.63          | 0.67  | 0.59  | 0.085    | 0.110 | 0.059 | 0.004  | 0.007 | 0.002 | 0.013     | 0.018 | 0.008 | 0.008         | 0.011 | 0.004 | 0.036  | 0.051 | 0.021 |
| 398                               | 0.32     | 0.42  | 0.21  | 0.59      | 0.63  | 0.54  | 0.59          | 0.65  | 0.53  | 0.095    | 0.104 | 0.087 | 0.006  | 0.008 | 0.003 | 0.017     | 0.024 | 0.011 | 0.011         | 0.015 | 0.008 | 0.039  | 0.053 | 0.025 |

Table S3: Apparent  $\text{Ca}^{2+}$  affinities of CaM/CaMBD complexes. Affinities are expressed as the  $[\text{Ca}^{2+}]$  required for saturating half of the protein-peptide complex with  $\text{Ca}^{2+}$  ( $\text{appK}_D$ ). 'Upper' and 'Lower' indicate the 95 % confidence interval for the fitted  $\text{appK}_D$ .

|                        | $\text{appK}_D$<br>( $\mu\text{M}$ ) | Upper | Lower | n          | Upper | Lower |
|------------------------|--------------------------------------|-------|-------|------------|-------|-------|
| CaM/CaMBD1a            | <b>2.1</b>                           | 2.3   | 1.8   | <b>1.3</b> | 1.5   | 1.1   |
| CaM/CaMBD1b            | <b>1.0</b>                           | 1.1   | 0.9   | <b>1.4</b> | 1.5   | 1.3   |
| CaM/CaMBD1b+P          | <b>1.5</b>                           | 1.7   | 1.3   | <b>1.2</b> | 1.4   | 1.0   |
| CaM/CaMBD2             | <b>0.020</b>                         | 0.021 | 0.018 | <b>2.5</b> | 3.0   | 1.9   |
| CaM/CaMBD3             | <b>0.067</b>                         | 0.072 | 0.063 | <b>1.7</b> | 1.9   | 1.6   |
| CaM/CaMBD2(+)          | <b>0.025</b>                         | 0.026 | 0.023 | <b>2.0</b> | 2.2   | 1.7   |
| CaM/CaMBD2(+)-W/A      | <b>0.36</b>                          | 0.38  | 0.34  | <b>1.8</b> | 1.9   | 1.6   |
| CaM/CaMBD2(+)-F/A      | <b>0.038</b>                         | 0.042 | 0.033 | <b>1.5</b> | 1.7   | 1.3   |
| N-domain/CaMBD2        | <b>1.2</b>                           | 1.3   | 1.2   | <b>1.4</b> | 1.5   | 1.3   |
| N-domain/CaMBD3        | <b>0.45</b>                          | 0.49  | 0.41  | <b>1.5</b> | 1.7   | 1.3   |
| N-domain/CaMBD2(+)     | <b>1.5</b>                           | 1.7   | 1.4   | <b>1.3</b> | 1.4   | 1.2   |
| N-domain/CaMBD2(+)-F/A | <b>1.5</b>                           | 1.6   | 1.4   | <b>1.4</b> | 1.5   | 1.3   |
| C-domain/CaMBD2        | <b>0.036</b>                         | 0.040 | 0.032 | <b>1.9</b> | 2.2   | 1.5   |
| C-domain/CaMBD3        | <b>0.13</b>                          | 0.14  | 0.11  | <b>1.6</b> | 1.8   | 1.4   |
| C-domain/CaMBD2(+)     | <b>0.054</b>                         | 0.061 | 0.048 | <b>1.7</b> | 1.9   | 1.4   |
| C-domain/CaMBD2(+)-F/A | <b>0.041</b>                         | 0.046 | 0.036 | <b>1.7</b> | 2.1   | 1.4   |
